# Supplementary material for: Primary amine modulated synthesis of two-dimensional porous nanocarbons with tunable ultramicropores
Source: Royal Society of Chemistry journal article supplement (doi:10.1039/c8ta09545k), 2018-01-01
Supplement: c8ta09545k1.pdf [file c8ta09545k1.pdf]

## Supporting information

### Primary Amine Modulated Synthesis of Two-Dimensional Porous Nanocarbons with Tunable Ultramicropores

Lu-Hua Zhang, Wen-Cui Li, Lei Tang, Quan-Gao Wang, Qing-Tao Hu, Yu Zhang and An-Hui Lu\*

State Key Laboratory of Fine Chemicals, School of Chemical Engineering, Dalian University of Technology, Dalian 116024, P. R. China

#### Table of Contents

**Fig. S1** SEM images of 2D porous nanocarbons

**Fig. S2** XPS of 2D porous nanocarbons

**Fig. S3** N<sub>2</sub> sorption isotherms and corresponding PSDs of C-PA-KC

**Fig.S4** N<sub>2</sub> sorption isotherms and corresponding PSDs of C-DAH-KC.

**Fig. S5** Gas adsorption isotherms for CO<sub>2</sub> and N<sub>2</sub>, IAST selectivity, isosteric heat of adsorption of CO<sub>2</sub>, and breakthrough curves for C-DAH-KC.

**Tab. S1** Elemental compositions of 2D porous nanocarbons

**Tab. S2** Relative surface concentrations of carbon species obtained by fitting the C 1s core level XPS spectra

**Tab. S3** Characterization results of representative 2D porous nanocarbons through XRD patterns and Raman spectra.

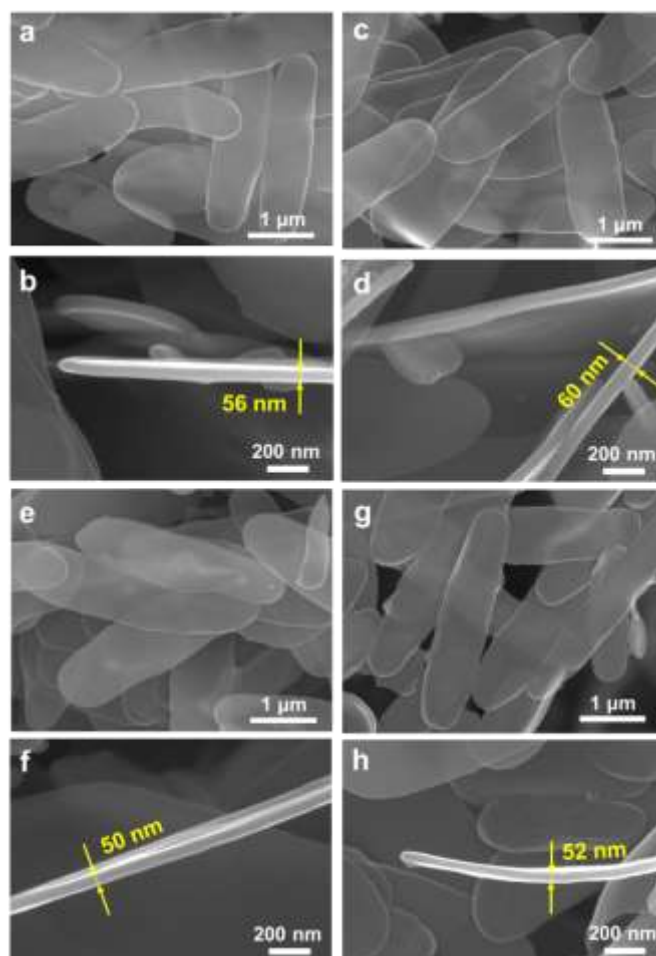

**Fig. S1** SEM images of (a, b) C-EA, (c, d) C-DPA, (e, f) C-BA, (g, h) C-HA.

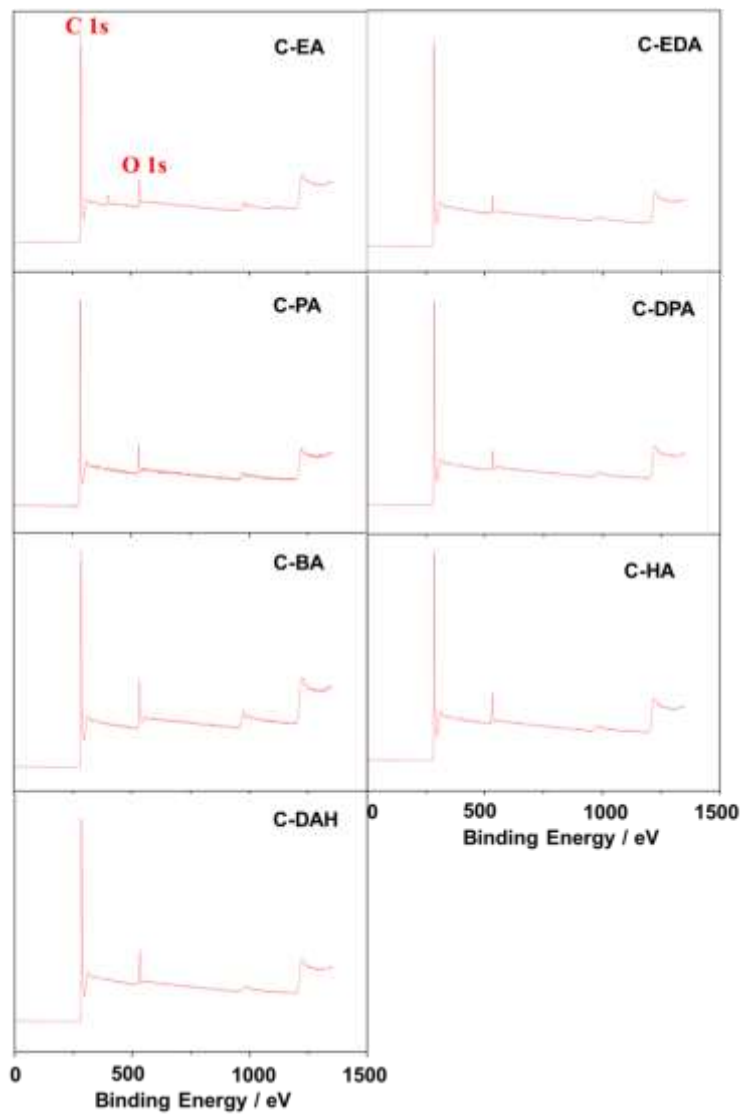

Fig.S2 XPS of 2D porous nanocarbons

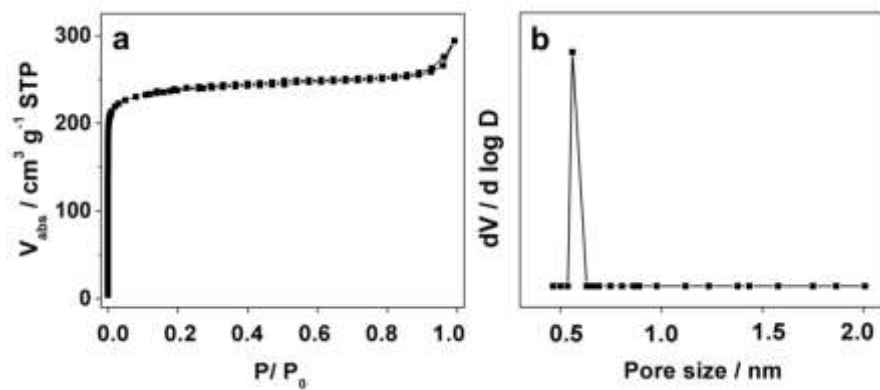

Fig. S3 (a)  $\text{N}_2$  sorption isotherms and (b) corresponding PSDs of C-PA-KC

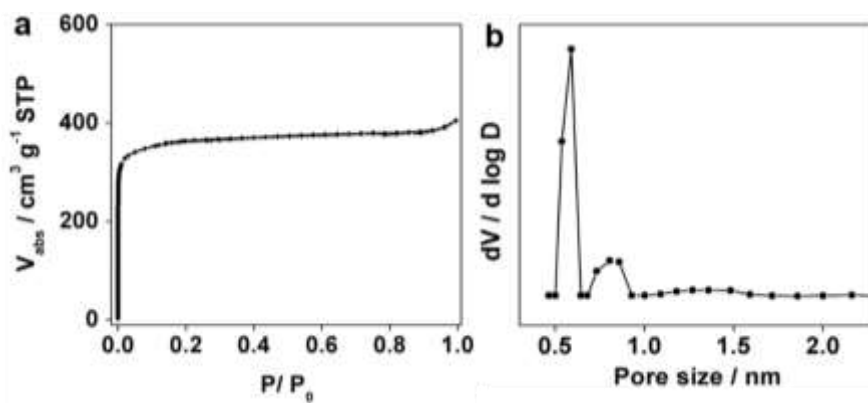

**Fig.S4** (a)  $N_2$  sorption isotherms and (b) corresponding PSDs of C-DAH-KC.

The surface area and pore volume of C-DAH-KC is  $1107 \text{ m}^2 \text{ g}^{-1}$  and  $0.58 \text{ cm}^3 \text{ g}^{-1}$ , respectively.

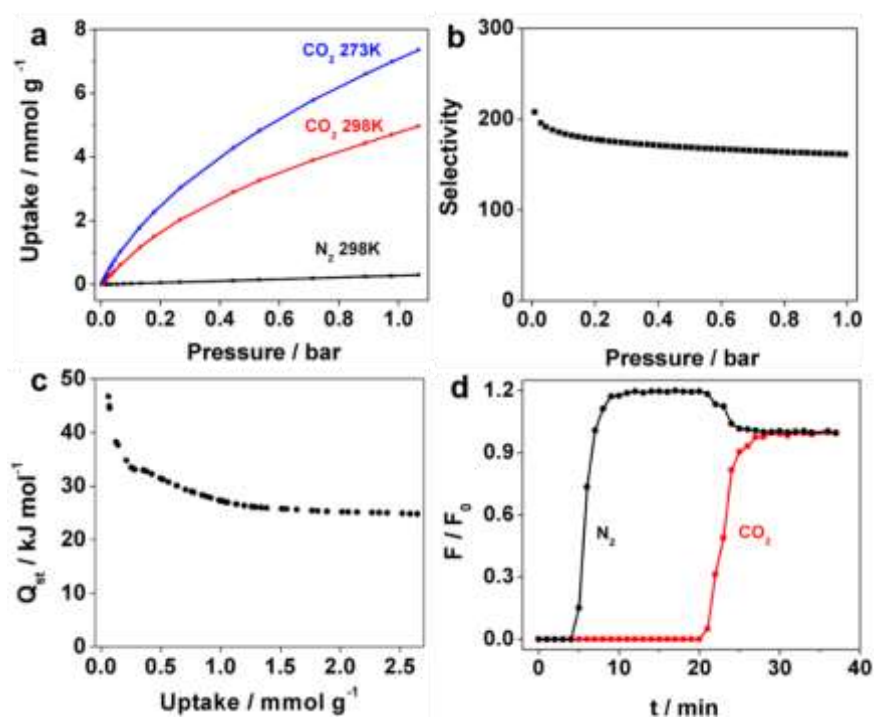

**Fig. S5** (a) Gas adsorption isotherms for  $\text{CO}_2$  and  $\text{N}_2$ , (b) IAST selectivity, (c) isosteric heat of adsorption of  $\text{CO}_2$ , and (d) breakthrough curves for C-DAH-KC.

**Tab. S1** Elemental compositions of 2D porous nanocarbons

| Sample | XPS (at.%) |     |      | Elemental analysis (wt.%) |     |     |      |
|--------|------------|-----|------|---------------------------|-----|-----|------|
|        | C          | N   | O    | C                         | H   | N   | O    |
| C-EA   | 93.8       | 1.5 | 4.7  | 89.6                      | 0.8 | 1.5 | 8.1  |
| C-EDA  | 95.9       | --  | 4.1  | 90.4                      | 0.6 | 1.6 | 7.4  |
| C-PA   | 92.7       | 1.2 | 6.1  | 91.3                      | 0.6 | 1.8 | 6.3  |
| C-DPA  | 90.5       | 1.1 | 8.4  | 84.5                      | 0.8 | 2.1 | 12.6 |
| C-BA   | 90.8       | --  | 9.2  | 86.7                      | 0.8 | 0.5 | 12   |
| C-HA   | 89.9       | 1.4 | 8.7  | 82.9                      | 1.4 | 1.4 | 14.3 |
| C-DAH  | 88.1       | 1.1 | 10.8 | 83.1                      | 2.1 | 2.5 | 12.3 |

**Tab. S2** Relative surface concentrations of carbon species obtained by fitting the C 1s core level XPS spectra

| Sample | 284.6 eV                 | 285.9 eV                 | 287.4 eV | 289.1 eV | 291.0 eV |
|--------|--------------------------|--------------------------|----------|----------|----------|
|        | (sp <sup>2</sup> carbon) | (sp <sup>3</sup> carbon) | (C-O)    | (O-C=O)  | (HO-C=O) |
| C-EA   | 0.72                     | 0.15                     | 0.04     | 0.05     | 0.04     |
| C-EDA  | 0.71                     | 0.15                     | 0.05     | 0.04     | 0.05     |
| C-PA   | 0.78                     | 0.11                     | 0.04     | 0.04     | 0.03     |
| C-DPA  | 0.66                     | 0.17                     | 0.07     | 0.04     | 0.05     |
| C-BA   | 0.64                     | 0.18                     | 0.07     | 0.06     | 0.04     |
| C-HA   | 0.62                     | 0.20                     | 0.08     | 0.07     | 0.03     |
| C-DAH  | 0.61                     | 0.22                     | 0.08     | 0.06     | 0.03     |

**Tab. S3** Characterization results of 2D porous nanocarbons through XRD and Raman

| Sample | 2 $\theta$ | d <sub>002</sub> | L <sub>c</sub> | 2 $\theta$ | L <sub>a</sub> | I <sub>D</sub> /I <sub>G</sub><br>ratio |
|--------|------------|------------------|----------------|------------|----------------|-----------------------------------------|
|        |            | (nm)             | (nm)           |            | (nm)           |                                         |
| C-EDA  | 22.46°     | 0.39             | 1.07           | 43.80°     | 3.42           | 1.58                                    |
| C-PA   | 22.44°     | 0.39             | 1.08           | 44.03°     | 3.40           | 1.55                                    |
| C-DAH  | 22.45°     | 0.39             | 1.09           | 43.87°     | 3.35           | 1.61                                    |
